1 **Risk factors associated with Avian Influenza subtype H9**  
2 **outbreaks on poultry farms in Kathmandu valley, Nepal**

3

4 Tulsiram Gombo<sup>1,2,\*</sup>, Bikash Raj Shah<sup>3</sup>, Surendra Karki<sup>4</sup>, Pragya Koirala<sup>1</sup>, Manju  
5 Maharjan<sup>1</sup> and Diker Dev Bhatt<sup>1</sup>

6 <sup>1</sup> Department of Livestock Services, Central Veterinary Laboratory, Kathmandu, Nepal

7 <sup>2</sup> Department of Clinical Sciences, College of Veterinary Medicine and Biomedical  
8 Sciences, Colorado State University, Fort Collins, CO, United States of America

9 <sup>3</sup> Institute of Agriculture and Animal Science, Tribhuvan University

10 <sup>4</sup> FHI 360 Nepal, Baluwatar, Kathmandu, Nepal

11

12 \*Corresponding author

13 Email: [tulsigompo@gmail.com](mailto:tulsigompo@gmail.com) (TRG)

14

15

16 **Abstract**

17 Poultry sector contributes to four percent in national GDP of Nepal. However, this sector is  
18 under threat with periodic outbreaks of Avian Influenza (AI) subtypes H5 and H9 since  
19 2009. This has been both a public health threat and an economic issue. Since last  
20 three years, outbreaks of AI subtype H9 has caused huge economic losses in major poultry  
21 producing areas of Nepal. However, the risk factors associated with these outbreaks have  
22 not been assessed. A retrospective case-control study was conducted from April 2018 to  
23 May 2019 in Kathmandu Valley to understand the risk factors associated with AI subtype

24 H9 outbreaks. Out of 100 farms selected, 50 were “case” farms, confirmed positive to H9  
25 at Central Veterinary Laboratory, Kathmandu, and other 50 farms were “control” farms,  
26 matched for farm size and locality within a radius of three km from the case farm. Each  
27 farm was visited to collect information using semi-structured questionnaire. Nineteen  
28 potential risk factors were included in the questionnaire under the broad categories: birds  
29 and farm characteristics, management aspects and biosecurity status of the farms.  
30 Univariable and multivariable logistic regression analysis were conducted to calculate  
31 corresponding odds ratios. Identified risk factors associated with AI subtype H9  
32 outbreaks in Kathmandu valley were: “Birds of age 31-40 days” (OR= 11.31, 95% CI:  
33 1.31-98.02, p=0.028), “Older farms operating for >5 years” (OR= 10.9, 95% CI: 1.76-  
34 66.93, p=0.01), “Commercial layers farms” (OR=36.0, 95% CI: 0.97-1332.40, p=0.052),  
35 “Used stream water to water birds (OR= 5.7, 95% CI: 1.10-30.13, p=0.039)”, “Farms  
36 without practice of fumigation after each batch of poultry (OR= 4, 95% CI: 1.44-13.13,  
37 p=0.009).”, “Farm with previous history of AI (OR= 13.8, 95% CI: 1.34-143.63, p = 0.028),  
38 “Did not applied farm boots (OR= 2.58, 95% CI: 0.98-6.80, p= 0.055), “Visitors allowed  
39 to enter the farms (OR= 2.5 , 95% CI: 1.011-6.17, p = 0.047) and “No foot bath at entry of  
40 farms (OR= 3.3 , 95% CI: 1.29-8.38, p = 0.013).\_This study depicts that outbreaks of AI  
41 subtype H9 in Kathmandu valley was related to poor management practices and  
42 biosecurity in the poultry farms. We suggest improving management practices and increase  
43 biosecurity in the farms to reduce incidences of AI subtype H9 outbreaks in Kathmandu  
44 valley.

45

46

47

48

49

50

## 51 **Introduction**

52 Avian influenza virus (AIV ) type A strains are broadly classified into two categories  
53 based on pathogenicity: highly pathogenic avian influenza (HPAI), that causes severe  
54 illness and high mortality , and low pathogenic avian influenza (LPAI) that typically  
55 causes little or no clinical signs in birds [1]. Generally, HPAI is caused by AIV subtypes  
56 H5 or H7 but not all H5 and H7 are highly pathogenic [2]. HPAI has a zoonotic potential  
57 and can be transmitted to human from infected birds [1]. AI subtype H9 are generally but  
58 not always LPAI, as subtype H9N2 circulating in the Eurasian region has caused huge  
59 economic losses to the poultry industry, owing to decline in egg production and mortality  
60 when associated with other infections [3]. Also, as this virus has human like receptor  
61 specificity [4], it possess a potential to transmit to human posing a public health threat [5-  
62 6].

63 Nepal is an agrarian based economy and livestock sector including fisheries contributes  
64 nearly 12.5% to the total GDP. Among livestock sub-sector, poultry alone contributes  
65 nearly four percent of the GDP [7]. The total population of poultry birds in Nepal is  
66 estimated to be nearly 72 million [8]. During the last three decades, poultry industry  
67 globally has undergone rapid changes and shifting towards intensive production system,  
68 enhanced biosecurity, introductions of commercial breeds and application of preventive  
69 health measures [9]. While in developing countries like Nepal, these adoptions are limited  
70 due to high infrastructure cost for maintenance of biosecurity, quality hybrid chicks,  
71 qualitative feed, biologicals and quality veterinary care [10].

72 The booming poultry industry of Nepal has been hit by periodic outbreaks of avian  
73 influenza creating a great loss to poultry industry. Nepal recorded the first HPAI outbreak  
74 in eastern part of Nepal, Jhapa on January 16, 2009 where 28,000 poultry were killed to  
75 control the disease [11]. Thereafter, Nepal experienced several outbreaks in years 2010,

76 2011, 2012, 2013, 2017, 2018 and 2019 [12]. From August 2016 to July 2017, 3.85%  
77 (6/156) swab samples were positive for H5 and 30.13% (47/156) samples were positive to  
78 subtype H9 by Real Time Reverse Transcriptase Polymerase Chain reaction (RT-PCR) at  
79 CVL. During the same period, out of 3930 cloacal and tracheal swab samples collected for  
80 bio-surveillance, 0.41% (16/3930) samples were positive for H9. Likewise, from August  
81 2017 to July 2018, 410 samples were received in CVL where 1.95% (8/410) samples were  
82 tested positive for H5N1 and 71.95% (295/410) were tested positive to H9. Out of 1597  
83 swab samples collected for bio-surveillance, 6.9% (110/1597) were tested positive for H9.  
84 The molecular tests performed on samples submitted from Nepal at OIE reference lab,  
85 Australian Animal Health Lab (AAHAL), Australia identified H5N1 virus to be of clade  
86 2.3.2.1a and H9N2 to be of G1-like H9N2 lineage with closest relationship to other G1-  
87 like H9N2 viruses that circulate in the South Asian region [13].  
88 Kathmandu valley ( Kathmandu, Bhaktapur and Lalitpur ), the capital of Nepal has been  
89 identified as a high risk area for both LPAI and HPAI [14]. There have been several  
90 outbreaks of AI subtype H5 and H9 in Kathmandu valley since 2013 [13], which have  
91 caused massive economic loss and direct negative effect on the livelihood of the farmers.  
92 In addition, first human death case of AI subtype H5 was confirmed in Nepal in May 2019  
93 [15]. Though there have been increase in the number of AI subtype H9 outbreaks, limited  
94 studies have been conducted to investigate the causes associated with these outbreaks. The  
95 identification of the potential risk factors would be helpful to mitigate the disease  
96 outbreaks in the future. The objective of this study is to identify the risk factors associated  
97 with AI subtype H9 outbreaks in Kathmandu valley.  
98

## 99 **Materials and Methods**

### 100 **Case definition and control farm selection**

101

102 A retrospective case-control design was used in this study. The case registry book of Central  
103 Veterinary Laboratory (CVL), Tripureswor, Kathmandu was accessed from March 2018 to  
104 April 2019 for the study. A farm was considered as a case if it was confirmed positive for  
105 AI subtype H9 in rapid antigen detection test followed by Polymerase Chain Reaction  
106 (PCR). The control farm was any farm with no history of AI subtype H9 outbreak and are  
107 closer to the case farms ( $\leq 3$  km from case farms). The ratio of case and control farm is 1:1  
108 with 50 cases and 50 control farms. The distance between the case and the control farms was  
109 estimated using Google maps version 9.87.4.

110 Data were collected using a structured questionnaire having nineteen objective and open-  
111 ended questions. Questionnaire were pre-tested at ten farms of Kathmandu valley for its  
112 validity. There is no need for ethical review to collect questionnaire based data about the  
113 management of poultry farms in Nepal. Yet, the verbal consent was obtained from the farm  
114 owners. The preliminary interview was conducted to the poultry owners who came for the  
115 diagnostic services at CVL and subsequent farm visit was made to get detailed farm  
116 information. Some of the case farms and the control farms were contacted by phone to  
117 schedule the meeting for the interview to get more information about the outbreak and the  
118 biosecurity status.

119

120 The risk factors for the detection of Avian Influenza were identified from literature review  
121 and expert's opinion [16]. The risk factors selected were broadly divided into following  
122 categories: i) Farm and bird characteristics ii) Farm management and ii) Biosecurity situation  
123 of the farm. In the farm and bird characteristic category, we documented farm location, farm  
124 type, age of farm, type of birds, age, flock size, number of flocks, and mortality patterns in

125 the farm. In farm management category, the variable documented include interval between  
126 two batches of birds, fumigation of farms before introducing new batch, culling of birds  
127 during morbidity, flooring type, water source and previous history of AI outbreak. To assess  
128 biosecurity level, we documented use of aprons, boots, and self-sanitization before entering  
129 farm, presence of other animals and birds in farm, litter disposal, dead bird disposal, distance  
130 of nearby farm, type of nearby farm, vehicles allowed in farm, fencing and distance from  
131 main road.

### 132 **Site of study**

133 Study was conducted in the poultry farms of Kathmandu valley. Kathmandu valley  
134 consists of three districts including capital city, Kathmandu and adjacent districts Lalitpur  
135 and Bhaktapur.

### 136 **Statistical analysis**

137 Data were entered in Microsoft Excel 2016 and converted to CSV file for risk factor analysis  
138 in STATA 14.2. All continuous variables were transfigured into categorical variables using  
139 quartiles and averages to avoid problem of linearity. The 2×2 table and chi-square test was  
140 performed to test independence between variables using online software OpenEpi version  
141 3.01 and corresponding p-values were calculated.

142 Univariable logistic regression analysis was applied to test association of individual risk  
143 factors with the detection of AI subtype H9. Odd ratios (ORs), their 95% confidence  
144 intervals (CIs) and corresponding p-values were estimated by logistic functions in STATA.  
145 Variables that met a cut-off of  $p \leq 0.2$  in the univariable logistic regression were considered  
146 for the final multivariable logistic regression. The adjusted odds ratios from the  
147 multivariable regression were calculated to measure the strength of associations of the risk  
148 factors to detection of AI subtype H9 in poultry farms of Kathmandu valley. The fitness of

149 the final multivariable model was evaluated using the “estat gof” functions of Hosmer-  
150 Lemeshow test in STATA.

## 151 **Results**

### 152 **Population characteristics**

153

154 The epidemic curve of AI subtype H9 outbreaks on farms of Kathmandu valley from March  
155 2018 to April 2019 is shown in Figure 1. There were altogether 105 farms detected positive  
156 to AI subtype H9 during the study period in Kathmandu Valley. An outbreak started from  
157 March 2018 and the highest number of cases were observed in May 2018 with 16 farms  
158 infected which gradually decreased to one case farm in September 2018. Again, in  
159 November 2018, the number of infected farms rose to 16 and the outbreaks continued until  
160 January 2019. Later in March 2019, the outbreaks boomed to 24 and on average eight farms  
161 remained infected until April 2019. Altogether 76 (61.9 %) commercial broilers, 30 (24.4%)  
162 layers, 14 (11.4%) backyard poultry (local chicken and duck) and three (2.44%) breeder  
163 farms were confirmed positive to H9 by PCR at the period of study. The mean flock size of  
164 the studied farms was 2018 (95% CI: 1686.16, 2350.04) and the median farm size was 1700  
165 (Range: 12-15000).

166

167 **Fig. 1: Epidemic curve for avian influenza subtype H9 infected farms in Kathmandu**  
168 **valley, Nepal**

169

170

171

172

173

## 174 **Univariable analysis of risk factors**

175

176 We selected total nineteen variables for the univariable analysis under three different  
177 categories. Under the bird and farm characteristics category: out of eight variables tested,  
178 six variables were significantly associated with the detection of AI subtype H9. Bird of  
179 ages between 31 to 40 days (OR= 4, 95% CI: 1.0-16.31), flock size of less than or equal to  
180 2000 (OR= 2.9, 95% CI: 1.06- 8.07), total mortality percentages of >30 to 50 (OR= 10.7,  
181 95% CI: (1.22-93.92) and >50 to 80 (OR= 6.1, 95% CI: (1.17-31.92), the farm types of  
182 giriraj and kuroiler (backyard poultry) are significantly protective to H9 compared to  
183 commercial broiler (OR= 0.14, 95% CI: 0.02-1.18) (Table-1).

184 Among the five variables under the farm management category, three variables were  
185 significantly associated with the AI subtype H9 outbreak. The associated variables were:  
186 “no fumigation “(OR= 2.8, 95 % CI: 1.11-7.01), “no culling of sick birds” (OR= 1.10, 95  
187 %CI: 0.46-2.62), “water supply by boring compared to tanker supply” (OR= 3.4, 95 % CI:  
188 0.90-13.26) and “the previous history of AI outbreak” (OR= 7.98, 95 %CI: (0.94-67.46)  
189 (Table 2).

190 In the biosecurity category, six risk factors were identified and two risk factors that were  
191 significantly associated with were: “no boots application while entering farm “(OR= 2.4,  
192 95 % CI: 0.98-5.68) and “no foot bath at entry of farm “(OR= 3.32, 95 % CI: 1.36-8.09)  
193 (Table 3).



**Table 1: Univariable logistic regression analysis of risk factors related to bird and farm characteristics**

| <b>Variables</b>                  | <b>Category</b> | <b>No of cases<br/>(n=50)</b> | <b>No of controls<br/>(n=50)</b> | <b>OR</b> | <b>95% CI</b> | <b>P value</b> |
|-----------------------------------|-----------------|-------------------------------|----------------------------------|-----------|---------------|----------------|
| Age of birds                      | 1-20 days       | 5                             | 10                               |           |               |                |
|                                   | 21-30 days      | 9                             | 13                               | 1.4       | (0.35-5.44)   | 0.641          |
|                                   | 31-40 days      | 14                            | 7                                | 4         | (1.0 -16.31)  | 0.050*         |
|                                   | 41 to 60 days   | 6                             | 4                                | 3         | (0.57-15.77)  | 0.194          |
|                                   | >60             | 16                            | 16                               | 2         | (0.56-7.18)   | 0.288          |
| Flock size                        | Upto 2000       | 30                            | 41                               | 2.9       | (1.06-8.07)   | 0.038**        |
|                                   | >2000 to 5000   | 15                            | 7                                | 3.4       | (0.62-18.82)  | 0.158          |
|                                   | >5000           | 5                             | 2                                |           |               |                |
| No of Poultry Shed                | >3              | 5                             | 1                                | 5.4       | (0.61-48.40)  | 0.128          |
|                                   | <=3             | 45                            | 49                               |           |               |                |
| Total mortality<br>percentage (%) | <=10            | 19                            | 29                               |           |               |                |
|                                   | >10 to 30       | 12                            | 18                               | 1.0       | (0.40-2.58)   | 0.971          |
|                                   | >30 to 50       | 7                             | 1                                | 10.7      | (1.22-93.92)  | 0.033**        |
|                                   | >50 to 80       | 8                             | 2                                | 6.1       | (1.17-31.92)  | 0.032**        |
|                                   | >80             | 4                             | 0                                | 1.0       |               |                |
| Age of farm                       | <=3 years       | 34                            | 41                               |           |               |                |
|                                   | >3 to 5 years   | 7                             | 5                                | 1.69      | (0.49-5.80)   | 0.406          |
|                                   | >5 years        | 9                             | 4                                | 2.71      | (0.77-9.59)   | 0.121          |

|                                               |                      |    |    |      |             |       |
|-----------------------------------------------|----------------------|----|----|------|-------------|-------|
|                                               | Commercial Broiler   | 27 | 30 |      |             |       |
| Type of farm                                  | Commercial Layers    | 15 | 9  | 1.85 | (0.70-4.92) | 0.216 |
|                                               | Breeder              | 1  | 0  | 1    |             |       |
|                                               | Duck                 | 2  | 0  | 1    |             |       |
|                                               | Giriraj_and_kuroiler | 1  | 8  | 0.14 | (0.02-1.18) | 0.071 |
|                                               | Local_backyard       | 4  | 3  | 1.48 | (0.30-7.23) | 0.627 |
| Nearby poultry farm located within a distance | <500 meter           | 35 | 31 | 1.43 | (0.62-3.29) | 0.399 |
|                                               | >=500 meter          | 15 | 19 |      |             |       |
| Farm distance from the main road              | <=1km                | 45 | 44 | 1.23 | (0.35-4.32) | 0.75  |
|                                               | >1km                 | 5  | 6  |      |             |       |

\*\* P – value <0.05, statistically significant

CI- Confidence interval; OR- Odds ratio

**Table 2: Univariable logistic regression analysis of risk factors related to farm management**

| <b>Variables</b>                                   | <b>Category</b>    | <b>No of case farms<br/>(n=50)</b> | <b>No of control<br/>farms(n=50)</b> | <b>OR</b> | <b>95% CI</b> | <b>P value</b> |
|----------------------------------------------------|--------------------|------------------------------------|--------------------------------------|-----------|---------------|----------------|
| Fumigation                                         | Yes                | 19                                 | 9                                    | 2.8       | (1.11-7.01)   | 0.029*         |
|                                                    | No                 | 31                                 | 41                                   |           |               |                |
| Culling                                            | Yes                | 35                                 | 36                                   | 1.10      | (0.46-2.62)   | 0.826          |
|                                                    | No                 | 15                                 | 14                                   |           |               |                |
| Flooring                                           | Muddy              | 38                                 | 36                                   | 1.23      | (0.50-3.02)   | 0.649          |
|                                                    | Cemented           | 12                                 | 14                                   |           |               |                |
| Water supply to birds                              | Well               | 24                                 | 24                                   | 2.0       | (0.65-6.20)   | 0.23           |
|                                                    | Boring             | 12                                 | 7                                    | 3.4       | (0.90-13.26)  | 0.07*          |
|                                                    | Stream             | 8                                  | 7                                    | 2.3       | (0.56-9.37)   | 0.25           |
|                                                    | Tanker/ jar supply | 6                                  | 12                                   |           |               |                |
| Previous history of AI<br>(H9) outbreak on<br>farm | Yes                | 7                                  | 1                                    | 7.98      | (0.94-67.46)  | 0.057*         |
|                                                    | No                 | 43                                 | 49                                   |           |               |                |

**Table 3: Univariable logistic regression analysis of risk factors related to farm biosecurity**

| <b>Variables</b>                       | <b>Category</b> | <b>No of case farms<br/>(n=50)</b> | <b>No of control farms<br/>(n=50)</b> | <b>OR</b> | <b>95% CI</b> | <b>P value</b> |
|----------------------------------------|-----------------|------------------------------------|---------------------------------------|-----------|---------------|----------------|
| Apron                                  | Yes             | 21                                 | 26                                    | 1.50      | (0.68-3.29)   | 0.317          |
|                                        | No              | 29                                 | 24                                    |           |               |                |
| Boot                                   | Yes             | 30                                 | 39                                    | 2.4       | (0.98-5.68)   | 0.054*         |
|                                        | No              | 20                                 | 11                                    |           |               |                |
| Visitors allowed at farm               | Yes             | 24                                 | 17                                    | 1.79      | (0.80-4.01)   | 0.156          |
|                                        | No              | 26                                 | 33                                    |           |               |                |
| Self-sanitization before entering farm | Yes             | 36                                 | 37                                    | 1.11      | (0.46-2.68)   | 0.822          |
|                                        | No              | 14                                 | 13                                    |           |               |                |
| Foot bath at entry areas to the farm   | Yes             | 10                                 | 23                                    | 3.32      | (1.36-8.09)   | 0.008          |
|                                        | No              | 39                                 | 27                                    |           |               |                |
| Fence around the farm                  | Yes             | 26                                 | 20                                    | 1.4       | (0.63-3.06)   | 0.421          |
|                                        | No              | 24                                 | 30                                    |           |               |                |

## 194 **Multivariable logistic regression analysis**

195

196 Altogether fifteen variables: six from bird and farm characteristics (Table-1), five from the  
197 farm management status category (Table-2) and three from the farm biosecurity status  
198 category (Table-3) were included in the multivariable logistic regression based on the cut-  
199 off criteria.

200 Ten factors were identified as the risk factors in the final model Table 4. The birds of age  
201 category from 31 to 40 days were 11 times more likely to be tested positive to AI subtype  
202 H9 compared to birds of age category 1 to 20 days (OR= 11.31, 95% CI: 1.31-98.02)  
203 (p=0.028) keeping others variables constant. The total mortality percentage of birds' due to  
204 the AI subtype H9 were more likely between the range of 30 to 50 percentage (OR= 144.7,  
205 95% CI: 4.53- 4622.49) (p=0.005).

206 The farms older than five years were almost eleven times more likely to be detected for  
207 avian influenza (OR= 10.9, 95% CI: 1.76- 66.93) compared to farms up to three years  
208 (p=0.01). The commercial layers farms are thirty-six times (OR= 36.0, 95% CI: 1.0-  
209 1332.40) more likely to be detected with the AI subtype H9 compared to commercial  
210 broilers farms (p=0.052).

211 The farms house that were not fumigated for every batch of poultry were four times (OR=  
212 4, 95 %CI: 1.44-13.13) more likely to be tested positive to AI subtype H9 compared to  
213 farms that got fumigated (p=0.009). In the water supply process on farms, the farms that  
214 used stream water for feeding poultry birds were almost significantly six times (OR= 5.7,  
215 95% CI: 1.10-30.13) in risk of detecting AI subtype H9 compared to farms that supplied  
216 city water tank respectively (Table 4). The farms that had a previous history of AI outbreak  
217 were almost fourteen times (OR= 13.8, 95 %CI: 1.34-143.63) more likely to be detected  
218 with AI subtype H9 (p = 0.028).

219 In the biosecurity status “that farms that did not applied boots to visitors while entering the  
220 farms were 2.58 times “(OR= 2.58, 95% CI: 0.98- 6.80) at risk of detecting AI subtype H9  
221 compared to farms that applied boots but the result is borderline significant (p=0.055). The  
222 farms that allow visitors to enter farm are almost 2. 5 times (OR= 2.5, 95% CI: 1.011,  
223 6.17) more likely in detecting the AI subtype H9 compared to farms that did not allow  
224 visitors to enter the farm (p=0.047). The farms that had no foot bath at entrance are almost  
225 three times (OR= 3.3, 95 %CI: 1.29, 8.38) more at risk of detecting AI subtype H9  
226 compared to farms that had no foot bath at entrance (p=0.013).

**Table 4: Multivariable logistic regression analysis related to farm and bird characteristics, farm management and biosecurity status**

| <b>Farm and bird characteristics</b> |                     |                             |                |                |
|--------------------------------------|---------------------|-----------------------------|----------------|----------------|
| <b>Variables</b>                     | <b>Category</b>     | <b>Adjusted odds ratios</b> | <b>95 % CI</b> | <b>P-value</b> |
| Age of birds                         | 1-20 days           | Ref                         |                |                |
|                                      | 21-30 days          | 3.02                        | (0.41-22.50)   | 0.28           |
|                                      | 31-40days           | 11.31                       | (1.31-98.02)   | 0.028*         |
|                                      | 41 to 60 days       | 1.31                        | (0.063-27.19)  | 0.86           |
|                                      | >60                 | 0.08                        | (0.002-3.6)    | 0.19           |
| Total Mortality due to H9            | <=10                | Ref                         |                |                |
|                                      | >10 to 30           | 0.9                         | (0.25-3.01)    | 0.83           |
|                                      | > <u>30</u> to 50   | 144.7                       | (4.53-4622.49) | 0.005*         |
|                                      | >50 to 80           | 38.7                        | (1.23-1220.8)  | 0.04*          |
|                                      | >80                 | 1.0                         |                |                |
| Age of farm                          | <=3 years           | Ref                         |                |                |
|                                      | >3 to <=5 years     | 4.0                         | (0.57-28.3)    | 0.16           |
|                                      | >5 years            | 10.9                        | (1.76-66.9)    | 0.01*          |
| Type of farm                         | CB                  | Ref                         |                |                |
|                                      | CL                  | 36.0                        | (1.0-1332.4)   | 0.05*          |
|                                      | Giriraj_and_kroiler | 0.6                         | (0.037-8.634)  | 0.68           |
|                                      | Local_backyard      | 5.6                         | (0.17-183.810) | 0.33           |

| <b>Farm management</b>                       |                       |      |               |        |
|----------------------------------------------|-----------------------|------|---------------|--------|
| Fumigation                                   | Yes                   | Ref  |               |        |
|                                              | No                    | 4.3  | (1.44-13.13)  | 0.009* |
| Water supply to birds                        | Well                  | 3.6  | (0.91-14.24)  | 0.07   |
|                                              | Boring                | 4.5  | (1.0-20.8)    | 0.06   |
|                                              | Stream                | 5.7  | (1.09-30.1)   | 0.04*  |
|                                              | Tanker and jar supply | Ref  |               |        |
| Previous history of AI (H9) outbreak on farm | Yes                   | 13.8 | (1.34-143.6)  | 0.03*  |
|                                              | No                    | Ref  |               |        |
| <b>Farm Biosecurity Status</b>               |                       |      |               |        |
| Application of Boots at farm work            | No                    | 2.58 | (1.0- 6.80)   | 0.05*  |
|                                              | Yes                   | Ref  |               |        |
| Foot bath at entry areas to the farm         | No                    | 3.3  | (1.29-8.38)   | 0.013* |
|                                              | Yes                   | Ref  |               |        |
| Visitors allowed at farm                     | No                    | Ref  |               |        |
|                                              | Yes                   | 2.50 | (1.011- 6.17) | 0.047* |

\* P – value <0.05, statistically significant

CI- Confidence interval; OR- Odds ratio



## 227 **Discussion**

228

229 This is the first case-control study conducted in Nepal to identify the risk factors associated  
230 with AI subtype H9 outbreaks in Nepal to the best of our knowledge. The results indicated  
231 that several farm and bird characteristics, farm management and biosecurity situations of the  
232 farms were associated to the detection of AI subtype H9 in poultry farms of Kathmandu  
233 valley.

234 Under the bird's characteristics category, the birds of ages between 31 to 40 days are highest  
235 risk of contracting AI subtype H9 indicating special attention should be given to the birds  
236 during that age by the farmers. A study in Pakistan [17] found that the "age of flock at the  
237 time of submission of samples >50 days" was a risk factor associated with outbreak of AI  
238 subtype H9N2 in commercial poultry farms of Pakistan. The mortality percentage due to  
239 disease was as high as 80 percentage in case farms in the birds. It may be probably due to  
240 secondary infections such as new castle disease and infectious bursal disease and E coli [17].

241 The farm-house that was greater than five years old were at higher risk of detecting AI  
242 subtype H9. As the farm production system becomes older, the biosecurity facilities may  
243 become older and disrupted. Also, as the farms grows older, it keeps producing many batches  
244 of poultry such that there is higher burden of virus around the poultry surroundings [16].  
245 Also, the commercial layers were at higher risk of detecting AI subtype H9. The probable  
246 reason could be the poor biosecurity status of the poultry farms such as movement and  
247 exchange of old egg trays between which is commonly practiced in Nepal.

248 Under the farm management category, the farms house that were not fumigated for every  
249 batch of poultry were four times more likely to be tested positive to AI subtype H9 compared  
250 to farms that got fumigated. This may be due to bacteria and virus that are missed by regular  
251 disinfection can be destroyed by fumigation only. The farms that use stream water for

252 feeding poultry birds are significantly six times at risks of detecting AI subtype H9 compared  
253 to farms that used bulk tank water supply. The stream water is source of environmental water  
254 where the wild birds that acts as mechanical source for contaminating water by their  
255 droppings [9,18-19]. The odds of AI subtype H9 outbreak is almost fourteen-fold greater for  
256 a farm that have previous history of AI outbreak than those without history of AI outbreak.  
257 In the biosecurity status, “that farms that did not applied boots to visitors while entering  
258 the farms were 2.58 times at risk of detecting AI subtype H9 compared to farms that  
259 applied boots. This finding is nearly consistent to study by Chaudhary et al., 2015, where  
260 “worker change disinfected boots” was found as risk factor associated with outbreak of AI  
261 subtype H9N2 in commercial poultry farms of Pakistan. The farms that allow visitors are  
262 almost 2.5 times more likely in detecting the AI subtype H9 compared to farms that did not  
263 allow. The farms that had no foot bath at entrance are almost three times more at risk of  
264 detecting AI subtype H9 compared to farms that had no foot bath at entrance. This result is  
265 consistent with the study conducted in south Korea [16].

266  
267 In this study, some of the variables such as flock size, number of poultry sheds in the farm,  
268 and use of aprons during the farm operations are not significantly associated with detection  
269 of AI subtype H9 which was found to be significantly associated with detection of AI  
270 subtype H9 in other studies, which may be either due to difference in the poultry productions  
271 system of Nepal from other countries or limited number of observations for the case and  
272 control and control data.

### 273 **Limitations of the study**

274  
275 The number of cases and the control farms selected is lower as many of the farms and  
276 owners were not reachable at the time of study such that the level of significance for some

277 variables are not achieved or are with the wider confidence interval of ORs. The farms that  
278 are close to CVL are more likely to submit samples than the farms located far away from  
279 the laboratory leading to selection bias. The farmers who are aware of AI and the  
280 diagnostic capability of the laboratory are more likely to visit the laboratory for the  
281 confirmation of the disease and small farms might have been missed. Some farms could  
282 not answer some questions such as “do you fumigate your farm?” as some of them are not  
283 aware of term fumigation that may lead to response bias. Also, some breeder farms were  
284 not willing to disclose their previous history of AI as they were paranoid of rejecting the  
285 chicks of their hatchery by the dealer if they know that their parent birds were AI infected.

## 286 **Conclusion**

287

288 We identified risk factors related to poultry bird characteristics, farm management and  
289 farm biosecurity characteristics that contributes to outbreak of avian influenza AI subtype  
290 H9 among the poultry farms of Kathmandu Valley. The study pinpoints importance of  
291 good management and application of strict biosecurity measures for the control of AI  
292 subtype H9 outbreaks in the poultry farms. This study can be a baseline for similar studies  
293 in future.

## 294 **Recommendation**

295

296 Good management and strict biosecurity can prevent AI subtype H9 infection in Kathmandu  
297 valley. Management of identified risk factors is a key consideration to mitigate the future  
298 risks of AI subtype H9 outbreak in Kathmandu valley. We suggest more detailed analytic  
299 study in the future.

300

301

302

303 **Supporting Information:**

304

305 **S1 Appendix.** Questionnaire for “Risk factors associated with AI subtype H9 outbreaks

306 on poultry farms in Kathmandu valley, Nepal” (PDF).

307

308 **Acknowledgement**

309

310 I want to acknowledge all the poultry farmers of Kathmandu valley who warmly welcomed

311 us on their farms and participated actively in answering the questions to our research.

312

313 **Authors contributions**

314

315 Conceived and designed the experiments: TRG. Performed experiments: TRG, BRS,

316 Analyzed the data: TRG. Performed laboratory procedures and contributed

317 reagents/materials/analysis tool: DDB, PK, MM and TRG. Wrote first draft of the paper:

318 TRG. Edited the first draft and contributed to finalize the paper: SK and TRG.

319

320 **Funding:** Authors did not receive any funding for this research.

321

322

323 **Competing Interest:** We declare we do not have any competing interest for this  
324 research.

325

326

327 **References**

328

329

330 1. Alexander DJ. An overview of the epidemiology of avian influenza. *Vaccine*.

331 2007;25: 5637–5644. doi:10.1016/j.vaccine.2006.10.051

332 2. Alexander DJ, Brown IH. History of highly pathogenic avian influenza. *Rev Sci*

333 *Tech*. 2009;28: 19–38.

334 3. Guo YJ, Krauss S, Senne DA, Mo IP, Lo KS, Xiong XP, et al. Characterization of the

335 Pathogenicity of Members of the Newly Established H9N2 Influenza Virus Lineages

336 in Asia. *Virology*. 2000;267: 279–288. doi:10.1006/viro.1999.0115

- 337 4. Matrosovich MN, Krauss S, Webster RG. H9N2 Influenza A Viruses from Poultry in  
338 Asia Have Human Virus-like Receptor Specificity. *Virology*. 2001;281: 156–162.  
339 doi:10.1006/viro.2000.0799
- 340 5. Butt KM, Smith GJD, Chen H, Zhang LJ, Leung YHC, Xu KM, et al. Human  
341 Infection with an Avian H9N2 Influenza A Virus in Hong Kong in 2003. *J Clin*  
342 *Microbiol*. 2005;43: 5760–5767. doi:10.1128/JCM.43.11.5760-5767.2005
- 343 6. Lin YP, Shaw M, Gregory V, Cameron K, Lim W, Klimov A, et al. Avian-to-human  
344 transmission of H9N2 subtype influenza A viruses: relationship between H9N2 and  
345 H5N1 human isolates. *Proc Natl Acad Sci*. 2000;97: 9654–9658.
- 346 7. Agriculture Information and Training Center. Agriculture Diary [Internet]: Nepal.  
347 Ministry of Agriculture and Livestock Services; 2019. Available  
348 from:2019.[http://aitc.gov.np/public/uploads/Pdffile/agriculture%20duary-2076-](http://aitc.gov.np/public/uploads/Pdffile/agriculture%20duary-2076-46662.pdf)  
349 [46662.pdf](http://aitc.gov.np/public/uploads/Pdffile/agriculture%20duary-2076-46662.pdf).
- 350 8. Central Bureau of Statistics (CBS). Nepal Commercial Poultry Survey 2014-  
351 14[Internet]. Kathmandu: CBS,2015. Available from:  
352 <http://old.cbs.gov.np/nada/index.php/catalog/72>.
- 353 9. Biswas PK, Christensen JP, Ahmed SSU, Das A, Rahman MH, Barua H, et al. Risk  
354 for Infection with Highly Pathogenic Avian Influenza Virus (H5N1) in Backyard  
355 Chickens, Bangladesh. *Emerg Infect Dis*. 2009;15: 1931–1936.  
356 doi:10.3201/eid1512.090643
- 357 10. Permin A, Pedersen G. The need for a holistic view on disease problems in free-range  
358 chickens. *Netw Smallhold Poult Dev R Vet Agric Univ Frederiksb Den*. 2002;
- 359 11. World Organization of Animal Health (OIE). Avian Influenza Portal [Internet]. Paris:  
360 OIE,2009. Available from: [http://www.oie.int/en/animal-health-in-the-world/update-](http://www.oie.int/en/animal-health-in-the-world/update-on-avian-influenza/2009/)  
361 [on-avian-influenza/2009/](http://www.oie.int/en/animal-health-in-the-world/update-on-avian-influenza/2009/).
- 362 12. World Organization of Animal Health (OIE). Immediate notification report [Internet].  
363 Paris: OIE, 2019. Available from:  
364 [http://www.oie.int/wahis\\_2/temp/reports/en\\_imm\\_0000029871\\_20190318\\_163913.p](http://www.oie.int/wahis_2/temp/reports/en_imm_0000029871_20190318_163913.pdf)  
365 [df](http://www.oie.int/wahis_2/temp/reports/en_imm_0000029871_20190318_163913.pdf)
- 366 13. Central Veterinary Laboratory(CVL). Annual Technical Bulletin [Internet. Nepal:  
367 CVL, 2018. Available from: <http://www.cvl.gov.np/uploads/files/5324820354.pdf>.
- 368 14. Karki S, Lupiani B, Budke CM, Manandhar S, Ivanek R. Cross-Sectional Serosurvey  
369 of Avian Influenza Antibodies Presence in Domestic Ducks of Kathmandu, Nepal.  
370 *Zoonoses Public Health*. 2014;61: 442–448. doi:10.1111/zph.12097
- 371 15. World Health Organization (WHO). Information on Avian Influenza A (H5N1)  
372 Identified in Human in Nepal [Internet]. Kathmandu: WHO Nepal 2019. Available  
373 from:[http://www.searo.who.int/nepal/documents/emergencies/Avian\\_Influenza\\_A\\_In](http://www.searo.who.int/nepal/documents/emergencies/Avian_Influenza_A_In_Human/en/)  
374 [\\_Human/en/](http://www.searo.who.int/nepal/documents/emergencies/Avian_Influenza_A_In_Human/en/).

- 375 16. Kim W-H, An J-U, Kim J, Moon O-K, Bae SH, Bender JB, et al. Risk factors  
376 associated with highly pathogenic avian influenza subtype H5N8 outbreaks on broiler  
377 duck farms in South Korea. *Transbound Emerg Dis*. 2018;65: 1329–1338.  
378 doi:10.1111/tbed.12882
- 379 17. Chaudhry M, Rashid HB, Thrusfield M, Welburn S, Bronsvoort BM. A Case-Control  
380 Study to Identify Risk Factors Associated with Avian Influenza Subtype H9N2 on  
381 Commercial Poultry Farms in Pakistan. Samal SK, editor. *PLOS ONE*. 2015;10:  
382 e0119019. doi:10.1371/journal.pone.0119019
- 383 18. Fang L-Q, de Vlas SJ, Liang S, Looman CWN, Gong P, Xu B, et al. Environmental  
384 Factors Contributing to the Spread of H5N1 Avian Influenza in Mainland China.  
385 Montgomery JM, editor. *PLoS ONE*. 2008;3: e2268.  
386 doi:10.1371/journal.pone.0002268
- 387 19. Si Y, de Boer WF, Gong P. Different Environmental Drivers of Highly Pathogenic  
388 Avian Influenza H5N1 Outbreaks in Poultry and Wild Birds. Wang Y, editor. *PLoS*  
389 *ONE*. 2013;8: e53362. doi:10.1371/journal.pone.0053362
- 390

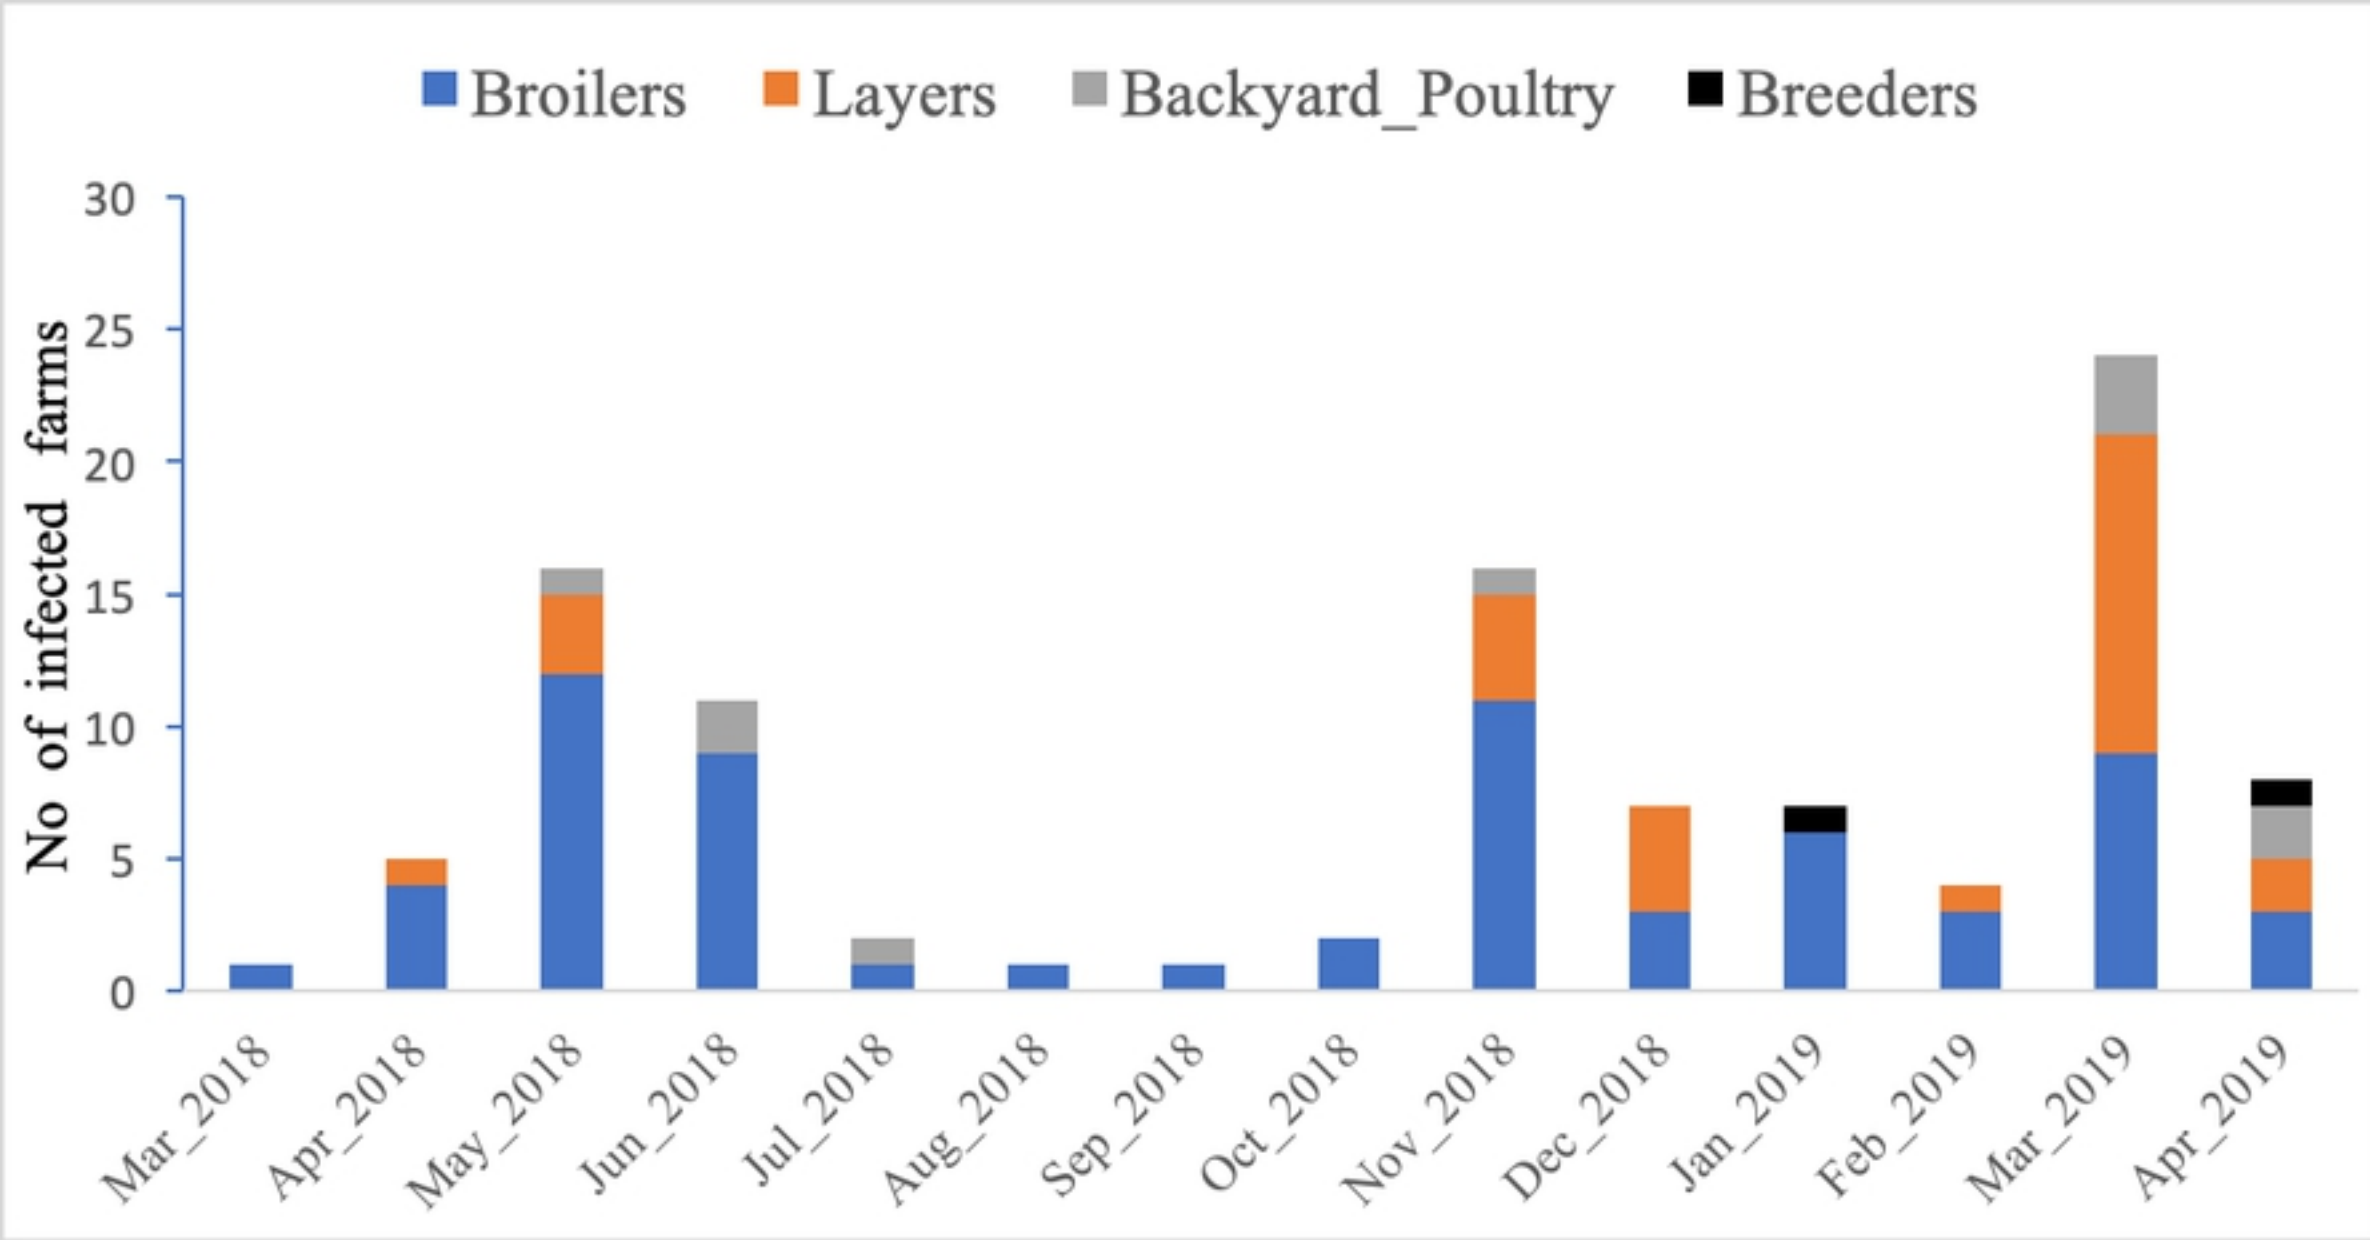

Figure: Fig 1
